# Supplementary material for: An environmentally benign process for the efficient synthesis of cyclohexanone and 2-methylfuran
Source: Royal Society of Chemistry journal article supplement (doi:10.1039/b513584b), 2005-11-17
Supplement: b513584b.pdf [file b513584b.pdf]

## An environmentally benign process for the efficient synthesis of cyclohexanone and 2-methylfuran

Hong-Yan Zheng<sup>ab</sup>, Yu-Lei Zhu<sup>\*ab</sup>, Zong-Qing Bai<sup>ab</sup>, Long Huang<sup>ab</sup>, Hong-Wei Xiang<sup>a</sup>,  
Yong-Wang Li<sup>a</sup>

<sup>a</sup>State Key Laboratory of Coal Conversion (SKLCC), Institute of Coal Chemistry, Chinese  
Academy of Sciences, P. O. Box 165, Taiyuan, 030001, P R China

<sup>b</sup>Graduate School of the Chinese Academy of Sciences, Beijing 10039, P R China

### Supporting Information

#### Thermodynamic Calculation

In this work, the equilibrium constant for the dehydrogenation of cyclohexanol (CHL) to cyclohexanone (CHN) is defined as followed:

$$K^0 = K_p K_\phi (P^0)^{-1} = \left( \frac{\chi_{CHN} \chi_{H_2}}{\chi_{CHL}} \right)_{eq} \left( \frac{\phi_{CHN} \phi_{H_2}}{\phi_{CHL}} \right)_{eq} \left( \frac{P^0}{P} \right)^{-1} \quad (1)$$

The equilibrium constant  $K^0$  used in the present work is cited from reference.<sup>1</sup>  $K_p$  represents the equilibrium constant based on partial pressure. The typical reaction condition in this work is at atmospheric pressure, so  $P^0 = P$ . Here  $\chi_i$  is the mole fraction of component  $i$ , and  $\phi_i$  is the fugacity coefficient.  $K_\phi$  is the fugacity coefficient ratio. The values of  $\phi_i$  and  $K_\phi$  can be calculated on the basis of the Redlich-Kwong equation of state.<sup>2</sup>

$$P = RT/(V - b) - a/T^{0.5}V(V + b) \quad (2)$$

The  $a$  and  $b$  are all constants in the Redlich-Kwong equation, which can be obtain from their critical properties.

$$a = 0.4278R^2T_C^{2.5} / P_C \quad (3)$$

$$b = 0.0867RT_C / P_C \quad (4)$$

When

$$Z = 1/(1 - h) - (A^2 / B)h/(1 + h) \quad (5)$$

$$A^2 = a / R^2T^{2.5} = 0.4278T_C^{2.5} / P_C T^{2.5} \quad (6)$$

$$B = b / RT = 0.0867T_C / P_C T \quad (7)$$

$$h = BP / Z \quad (8)$$

are assumed, the fugacity coefficient  $\phi_i$  is given by

$$\ln \phi = Z - 1 - \ln(Z - BP) - (A^2 / B) \ln(1 + BP / Z) \quad (9)$$

The critical temperature  $T_C$  and pressure  $P_C$  of each component used in the present work is cited from reference.<sup>3</sup>  $Z$  is compressibility factor.

## References

- 1 (a) A.H.Cubberley and M.B. Mueller, *J. Am. Chem. Soc.*, 1947, **69**, 1535; (b) *Manufacture and Application of Caprolactam*, ed. V.R.Yang, Hydrocarbon processing Press, Beijing, 1988, pp.101.
- 2 O. Redlich and J.N.S. Kwong, *Chem. Rev.*, 1949, **44**, 233.
- 3 (a) W.V. Steele, R.D. Chirico, S.E. Knipmeyer and A. Nguyen, *J. Chem. Eng. Data*, 1997, **42**, 1021; (b) S.K. Quadri and A.P. Kudchadker, *J. Chem. Thermodyn.*, 1991, **23**, 129; (c) H.K. Onnes, C.-A. Crommelin and P.G. Cath, *Proc. K. Ned. Akad. Wet.*, 1917, **20**, 178.
